# Supplementary material for: Tensor decomposition-based unsupervised feature extraction identifies candidate genes that induce post-traumatic stress disorder-mediated heart diseases
Source: PubMed Central journal article supplement (PMC5763504; doi:10.1186/s12920-017-0302-1), 2017-12-21

# cluster 1

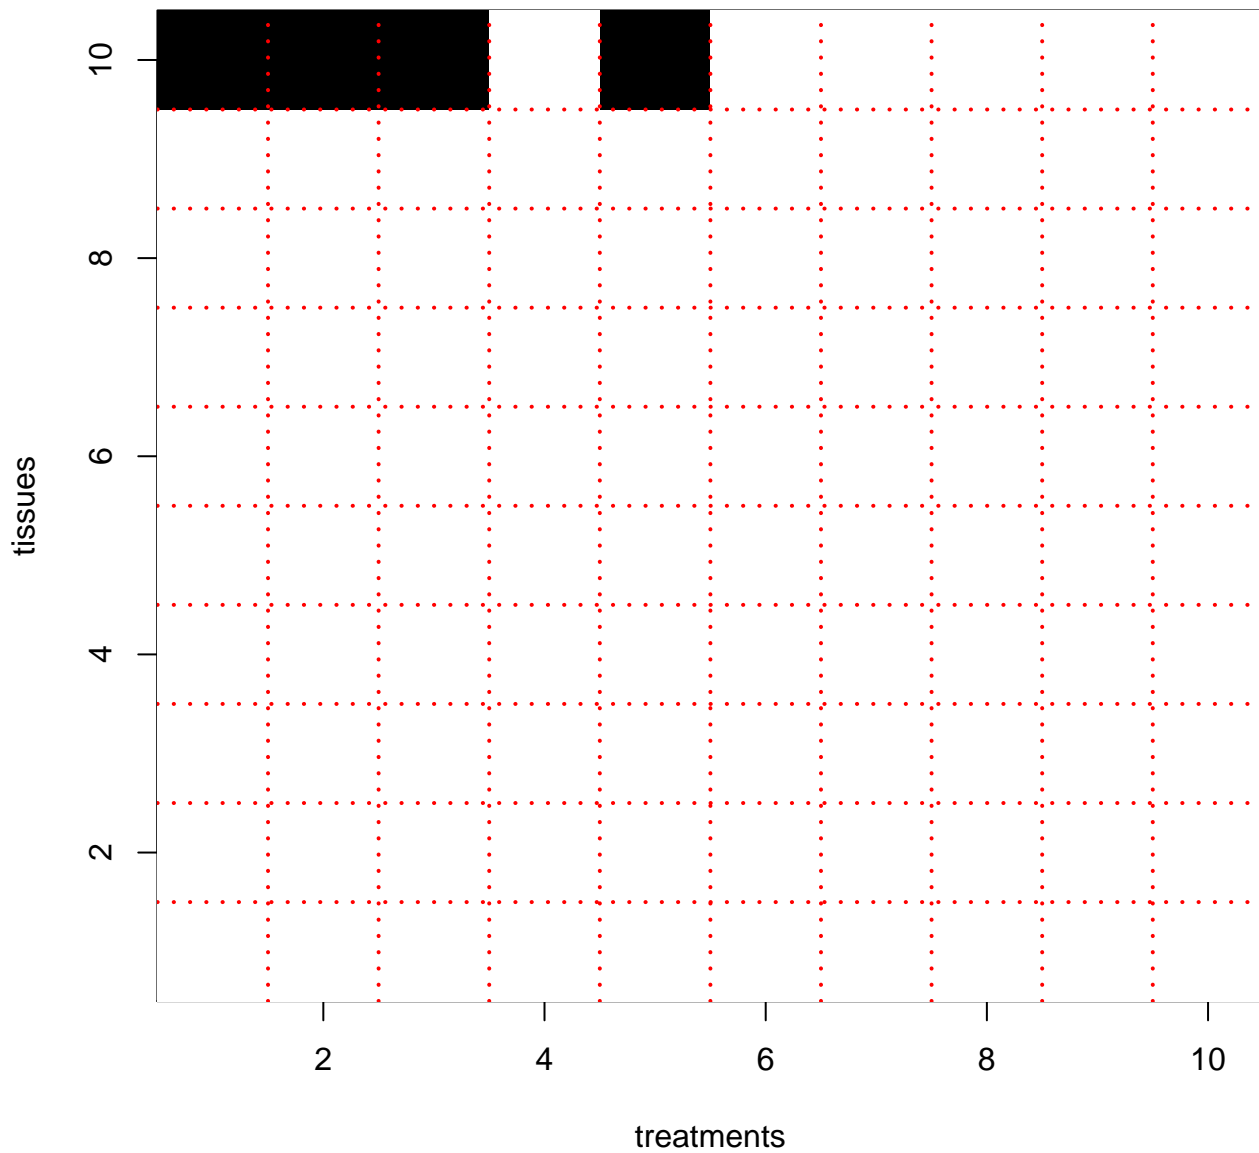

## cluster 2

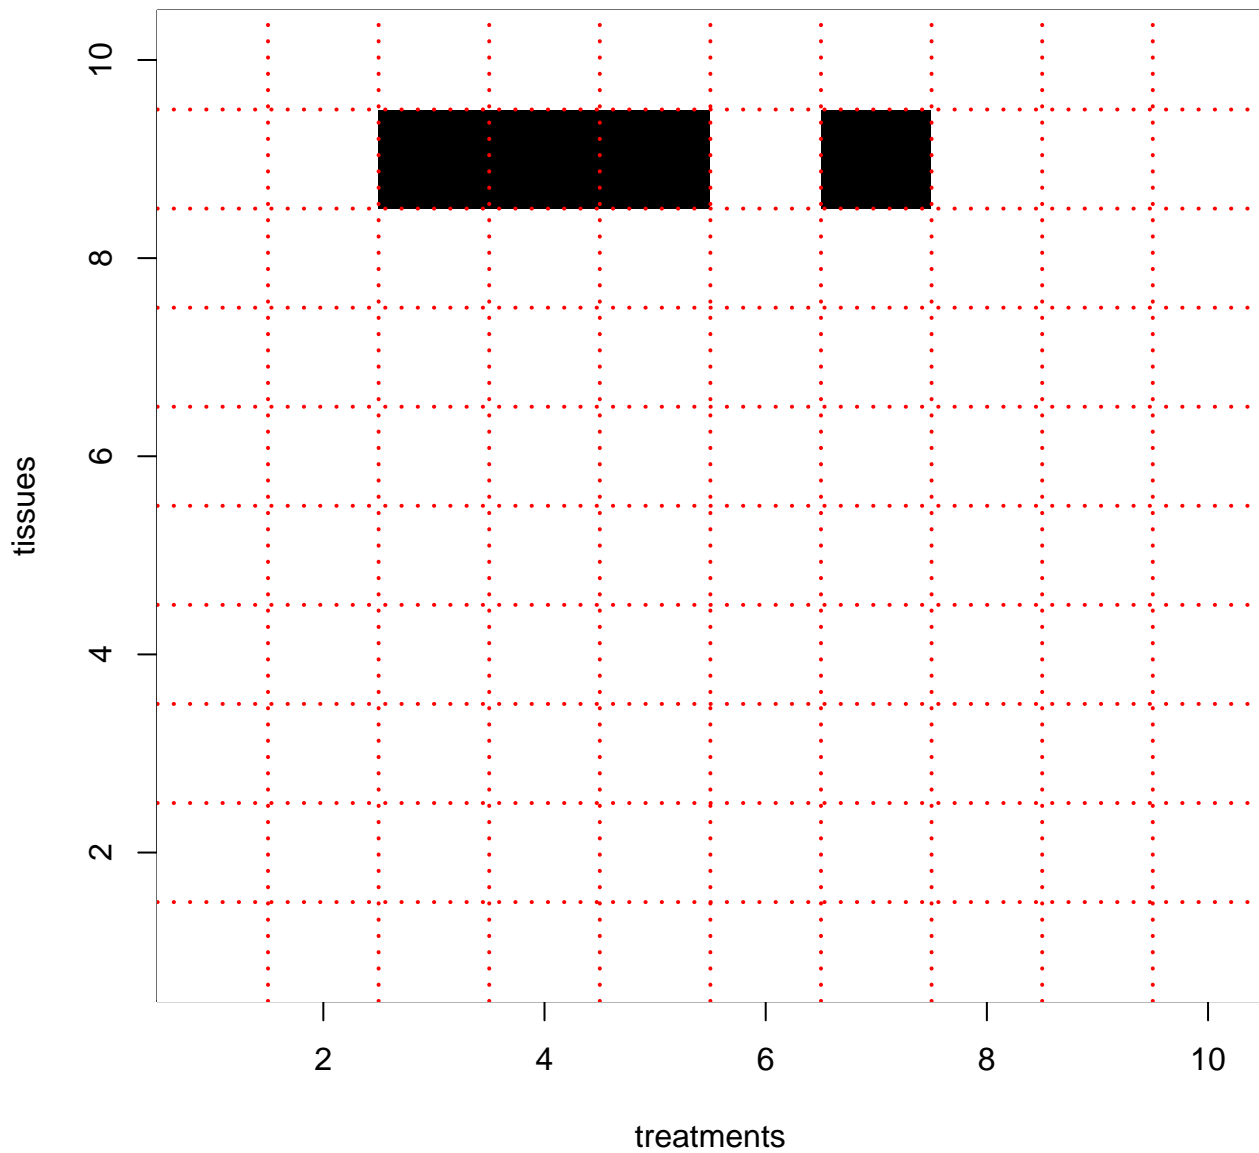

### cluster 3

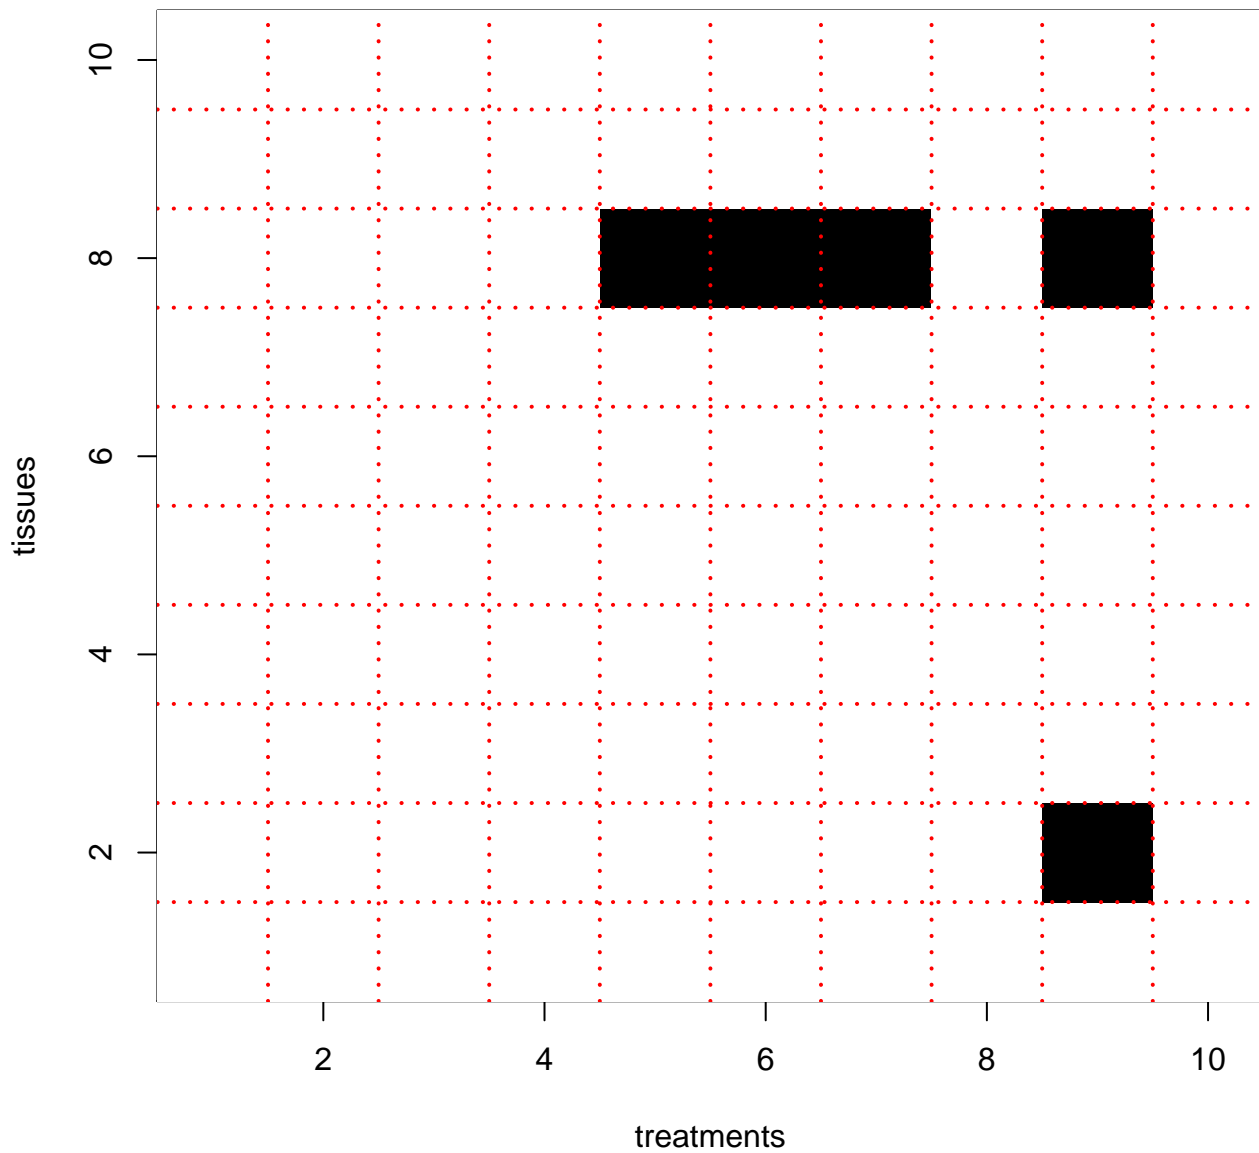

# cluster 4

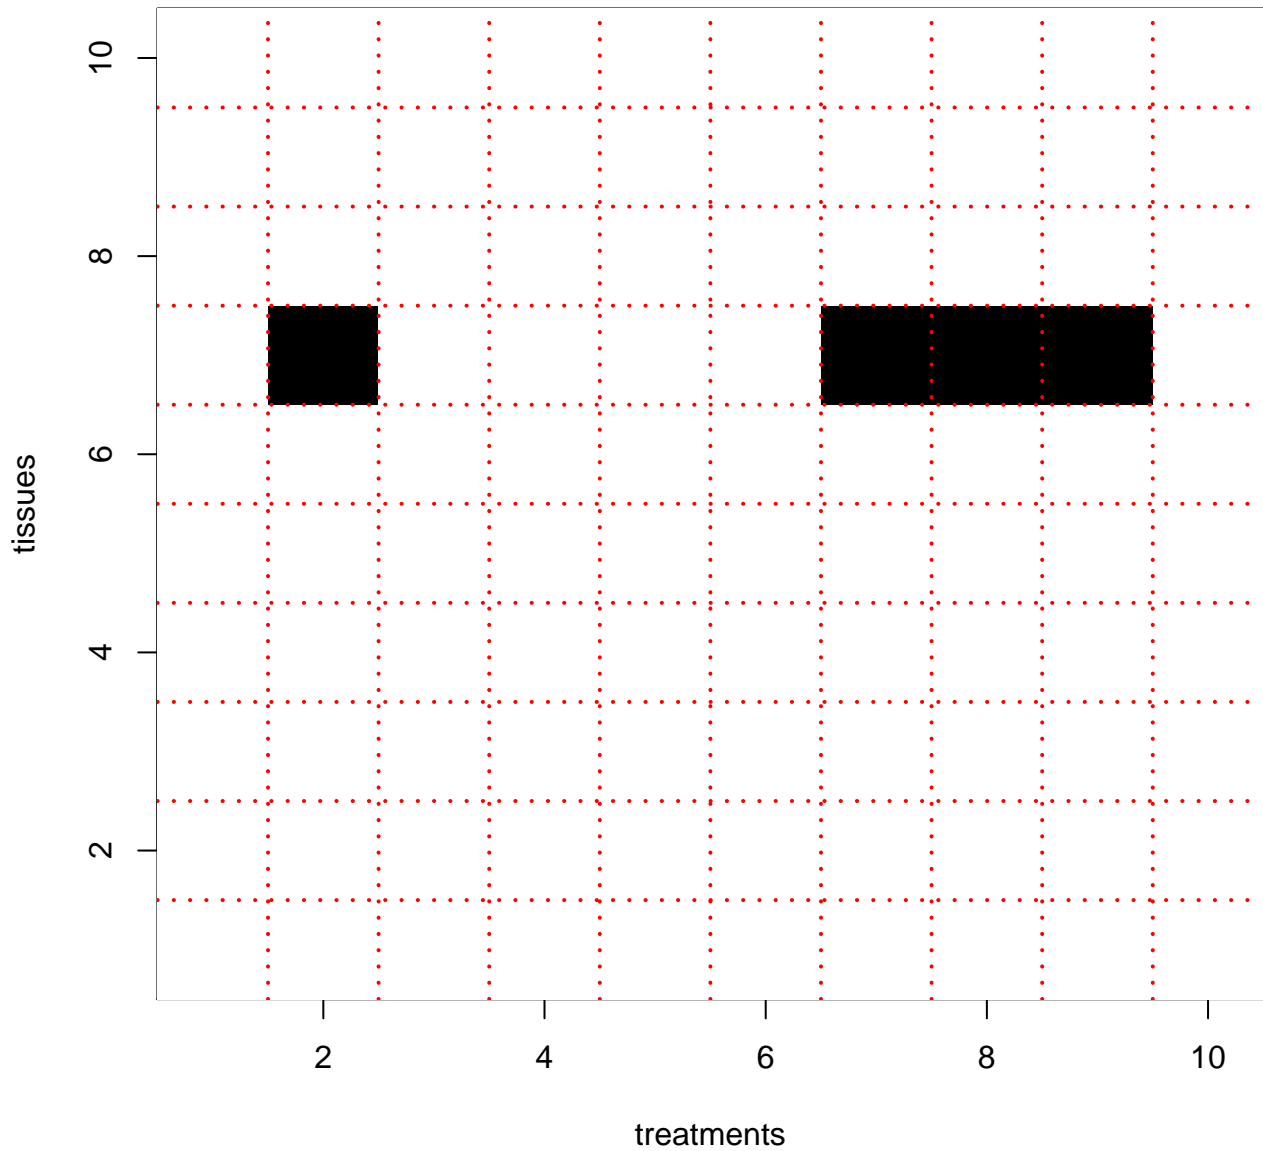

# cluster 5

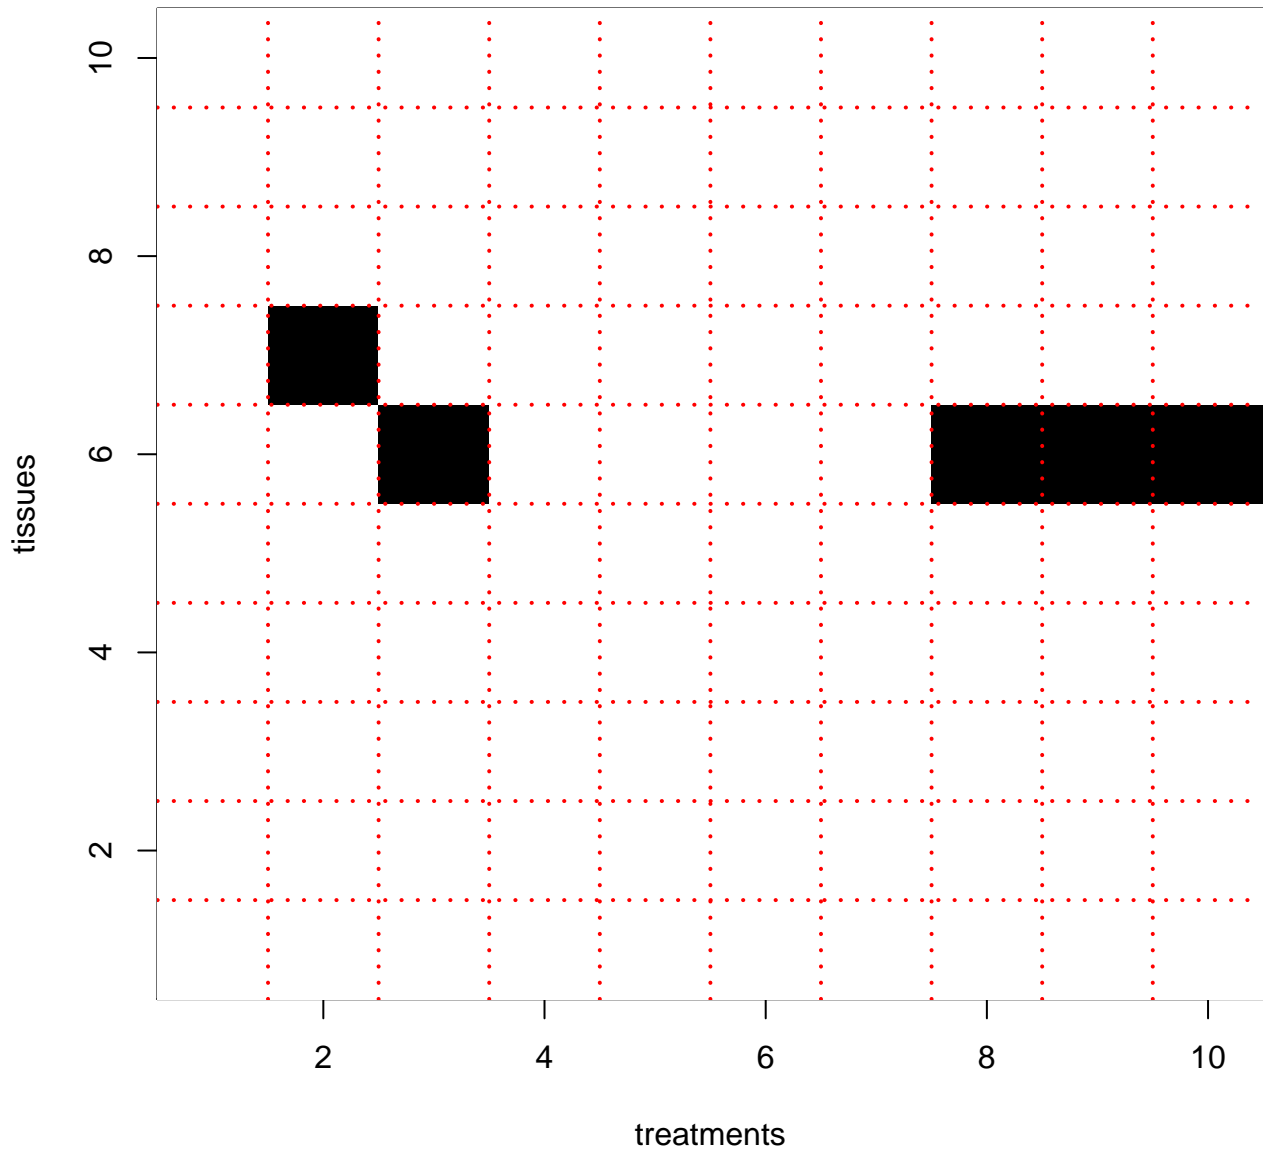

# cluster 6

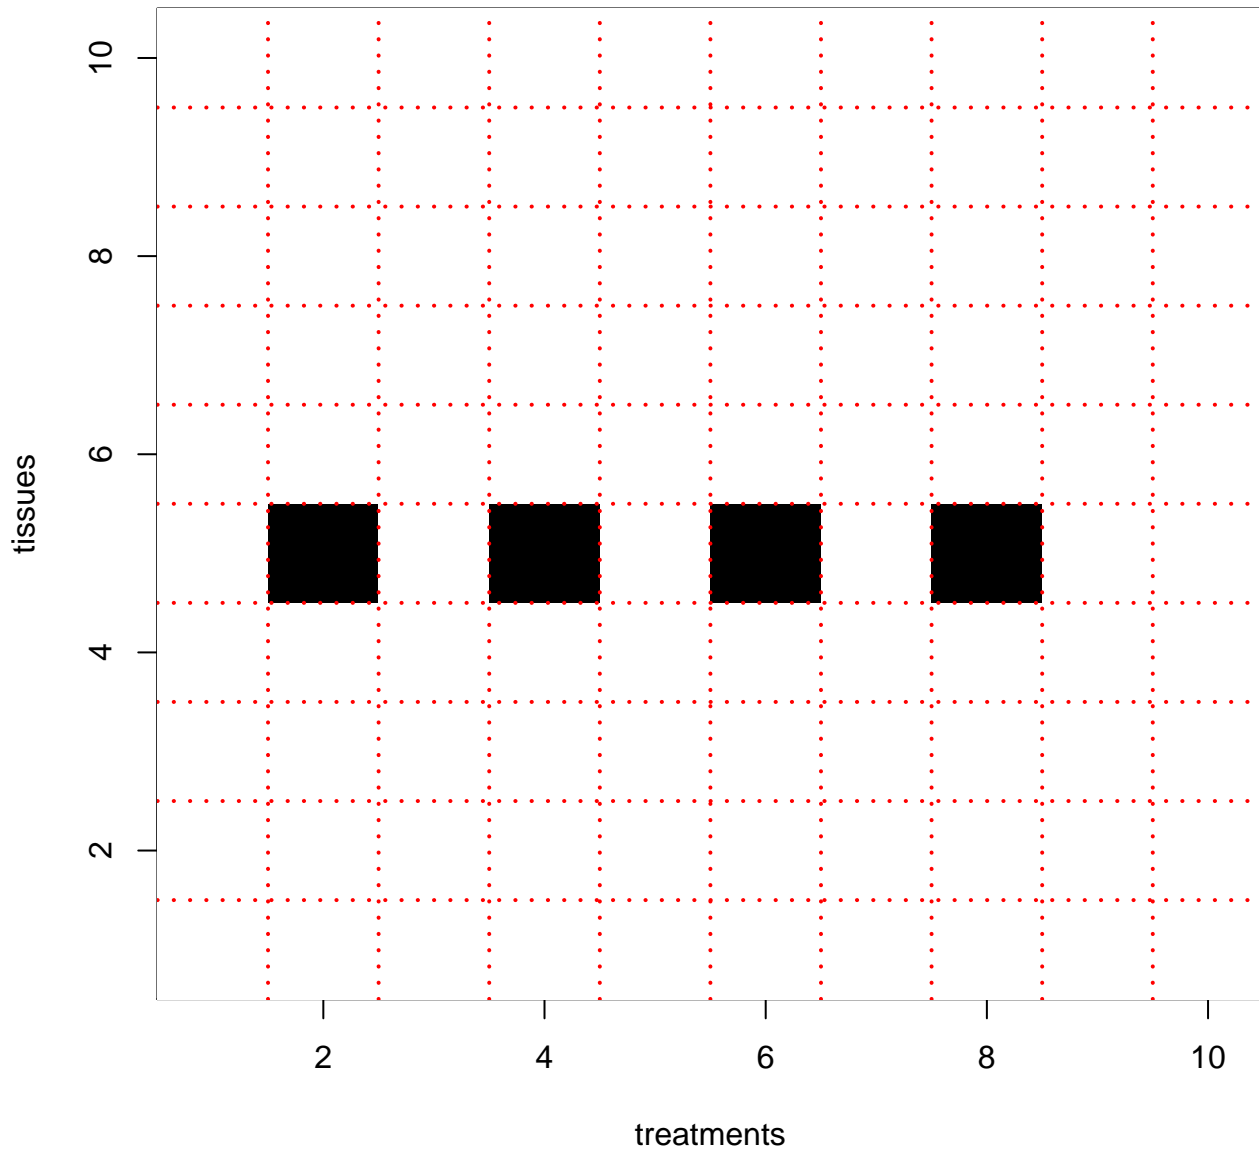



# cluster 8

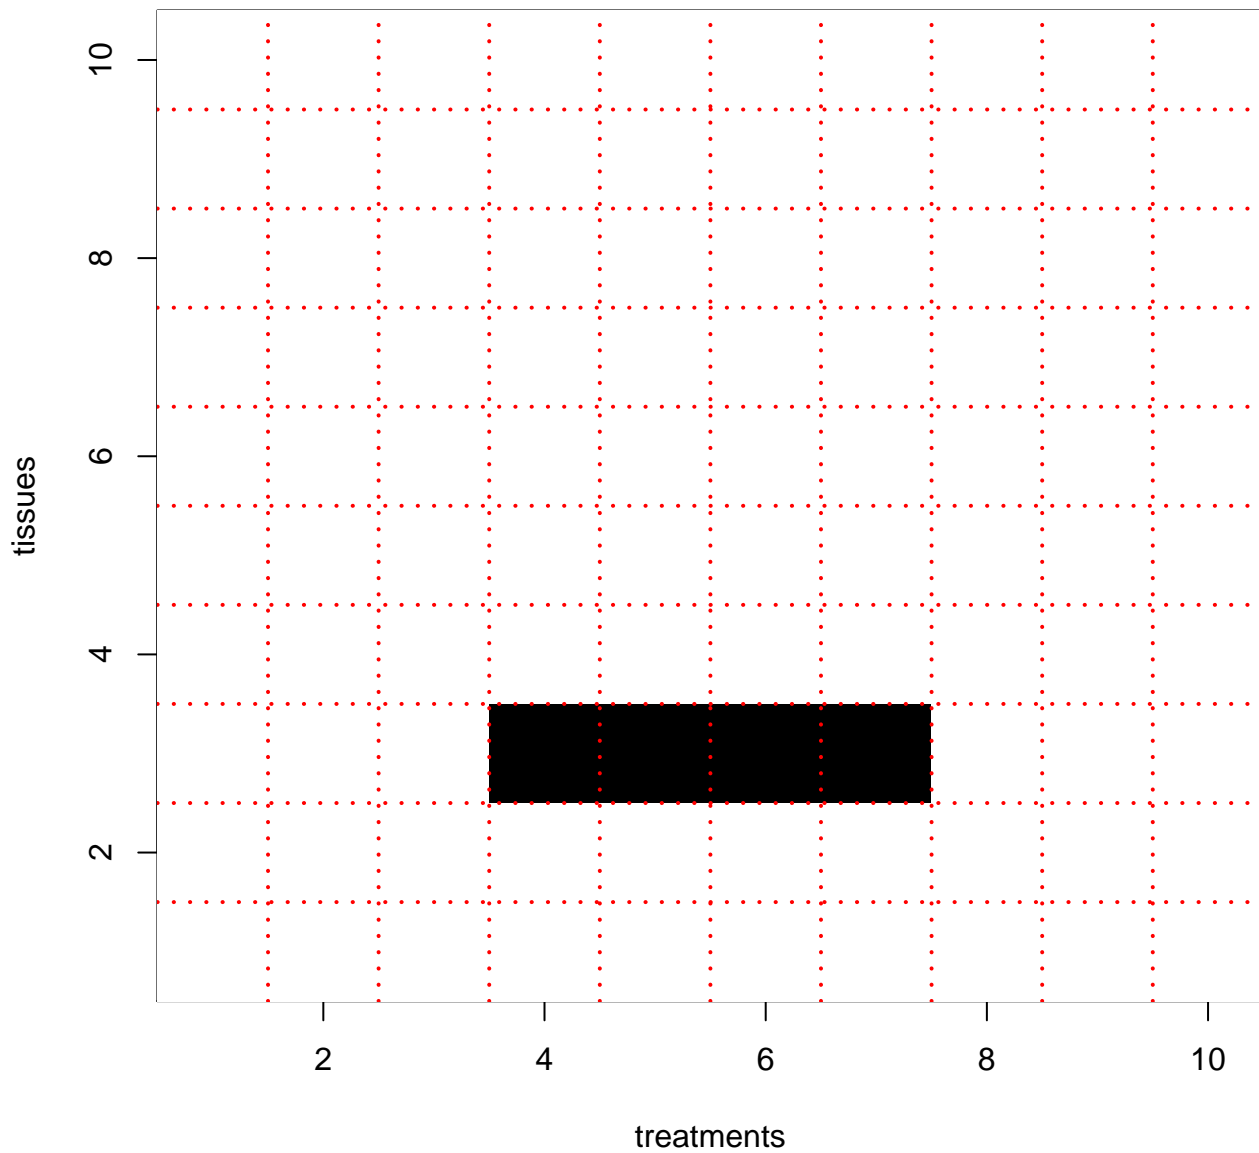



# cluster 9

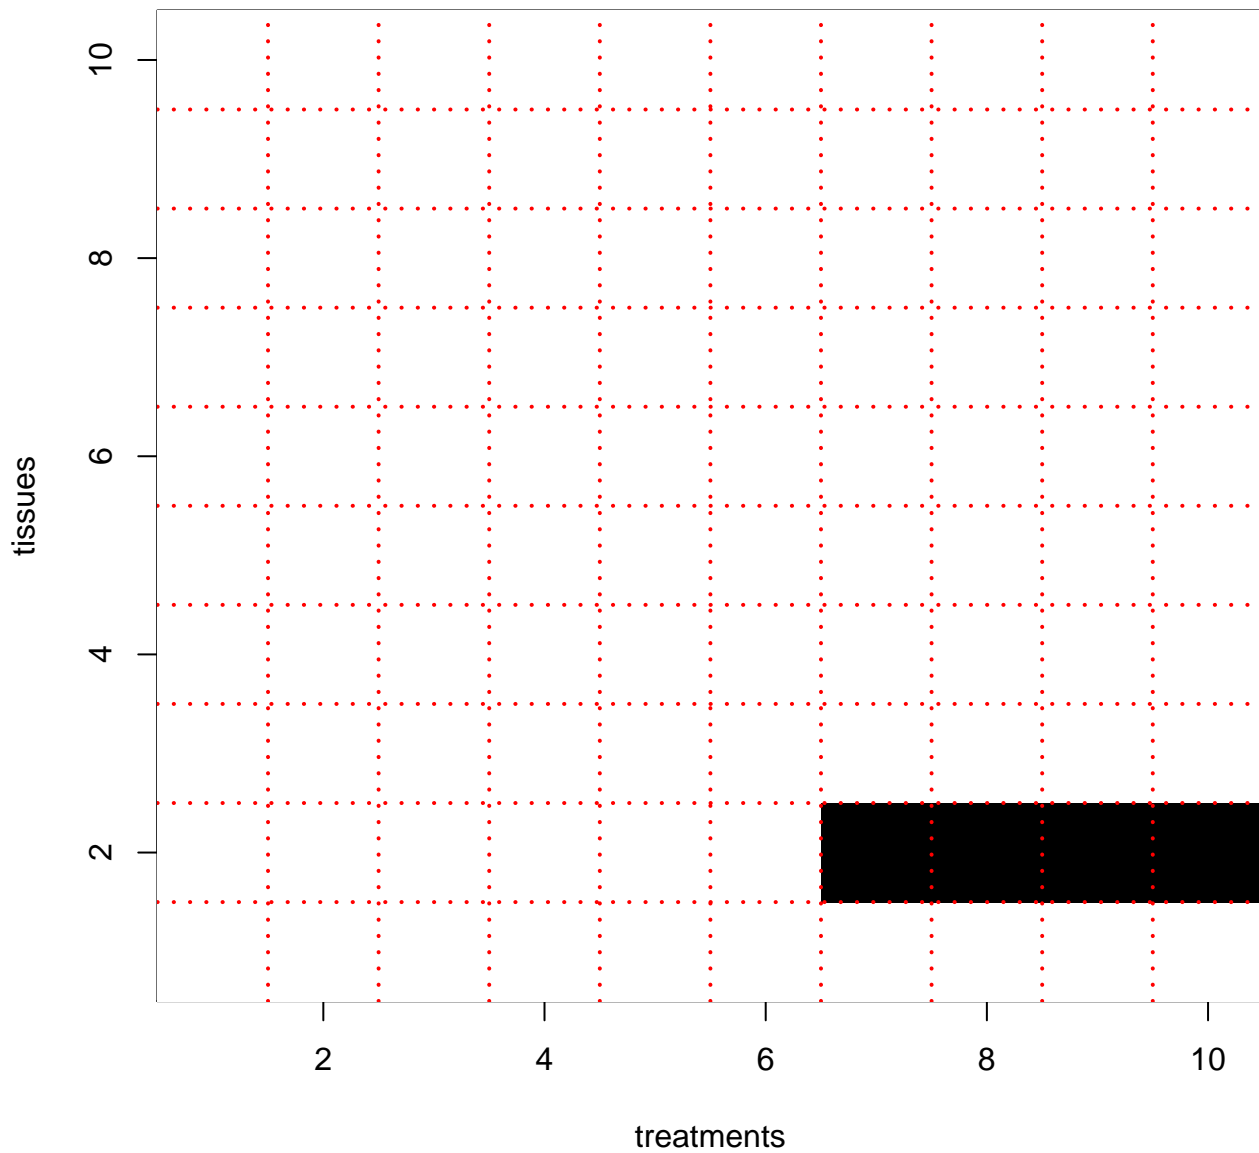

Supplement: 12920_2017_302_MOESM1_ESM.pdf [file 12920_2017_302_MOESM1_ESM.pdf]
