# Supplementary material for: Tensor decomposition-based unsupervised feature extraction identifies candidate genes that induce post-traumatic stress disorder-mediated heart diseases
Source: PubMed Central journal article supplement (PMC5763504; doi:10.1186/s12920-017-0302-1), 2017-12-21

# 1th sample sigular value vector

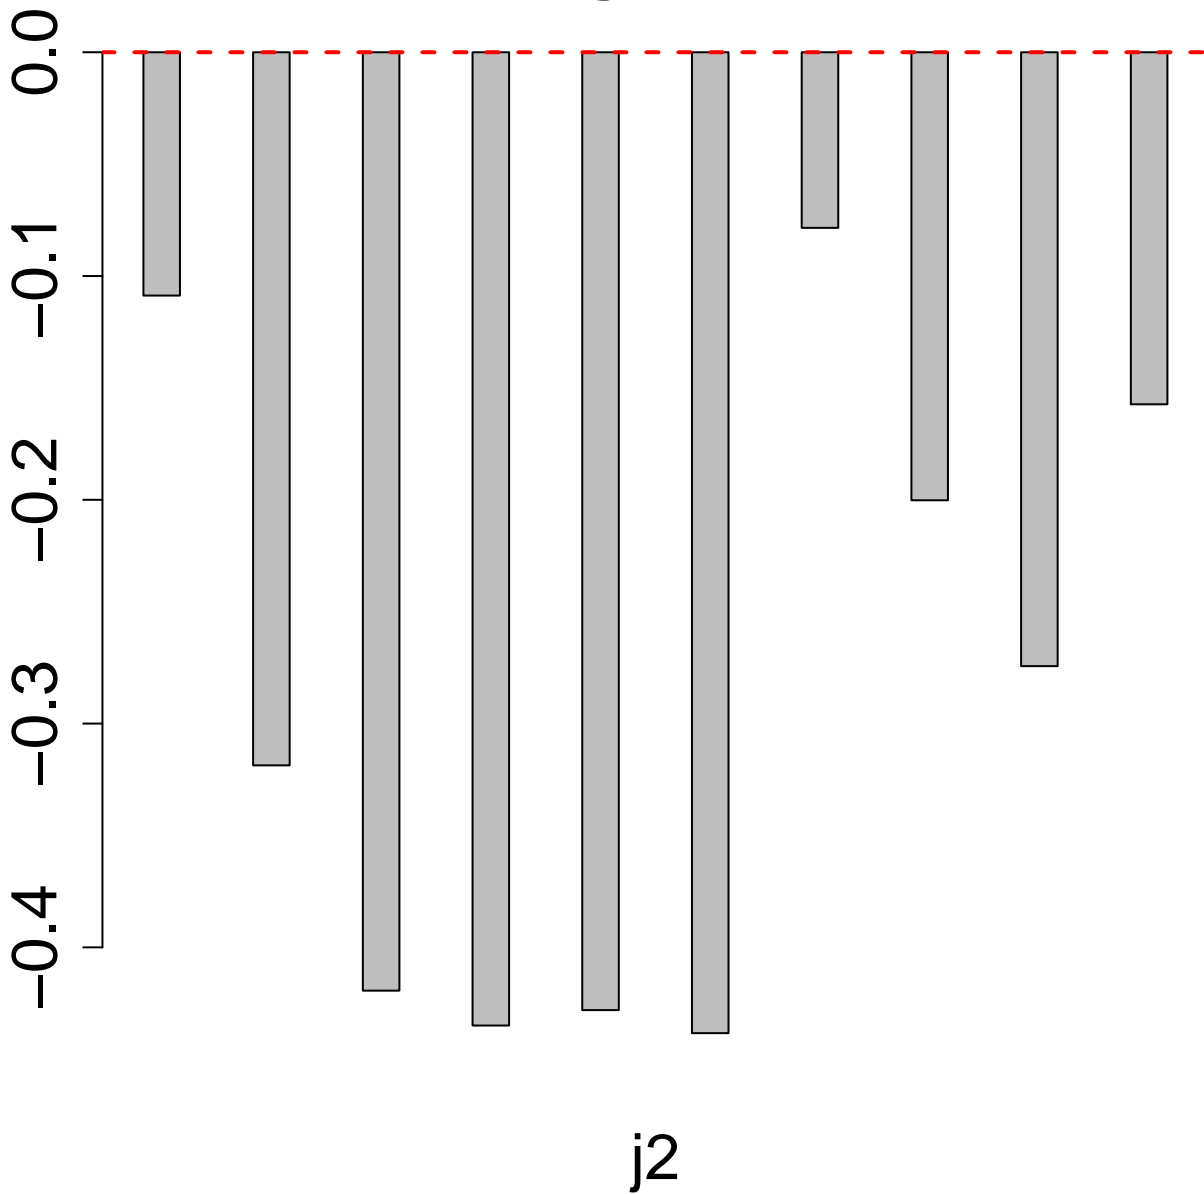

## 2th sample sigular value vector

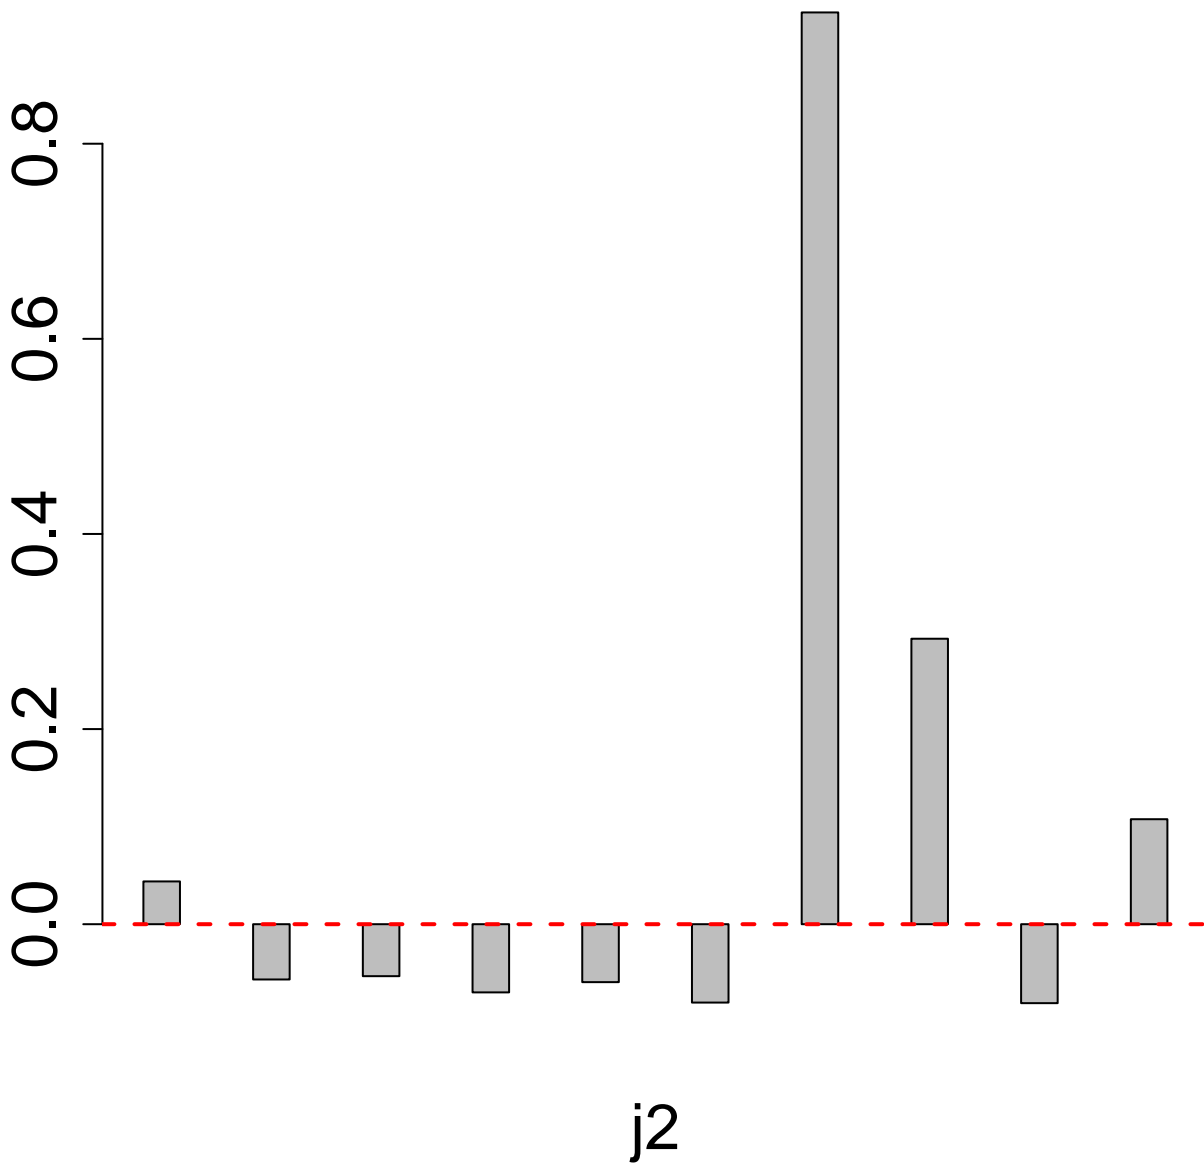

# 3th sample sigular value vector

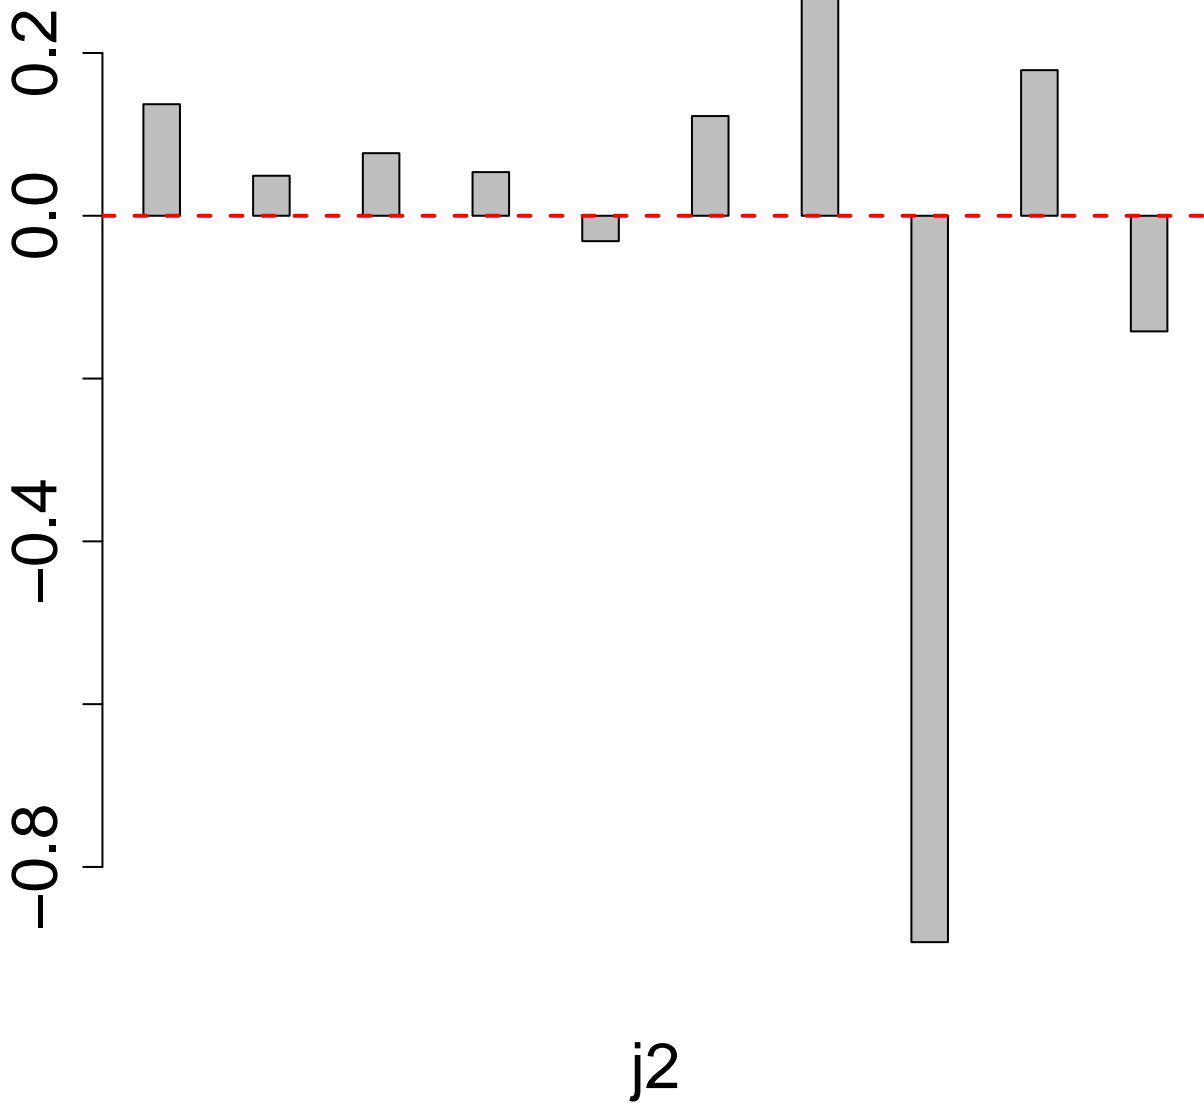

# 4th sample sigular value vector

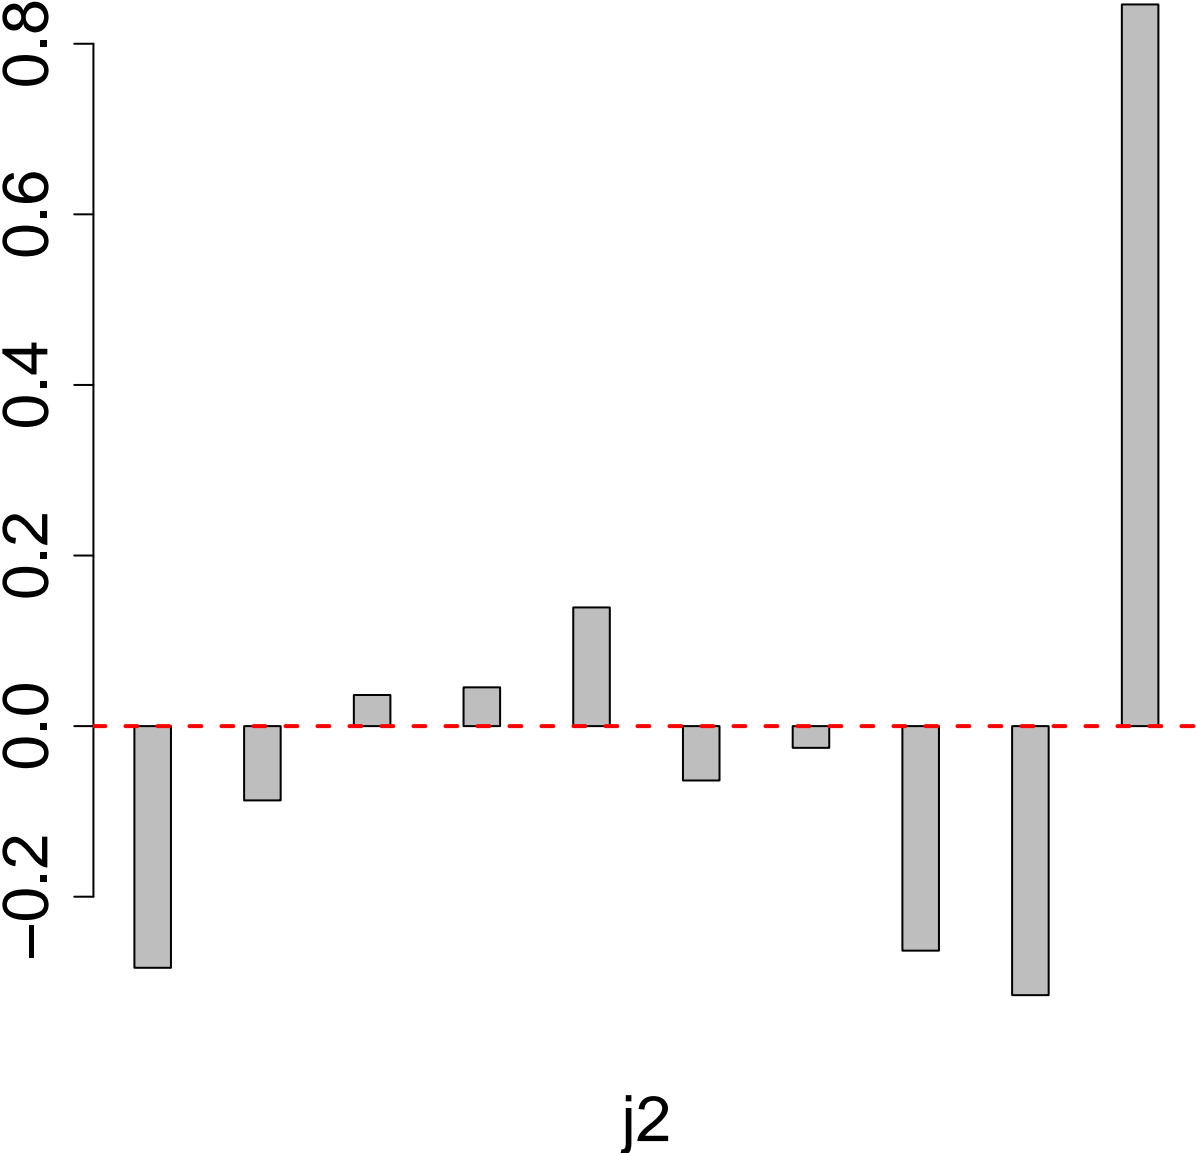

# 5th sample sigular value vector

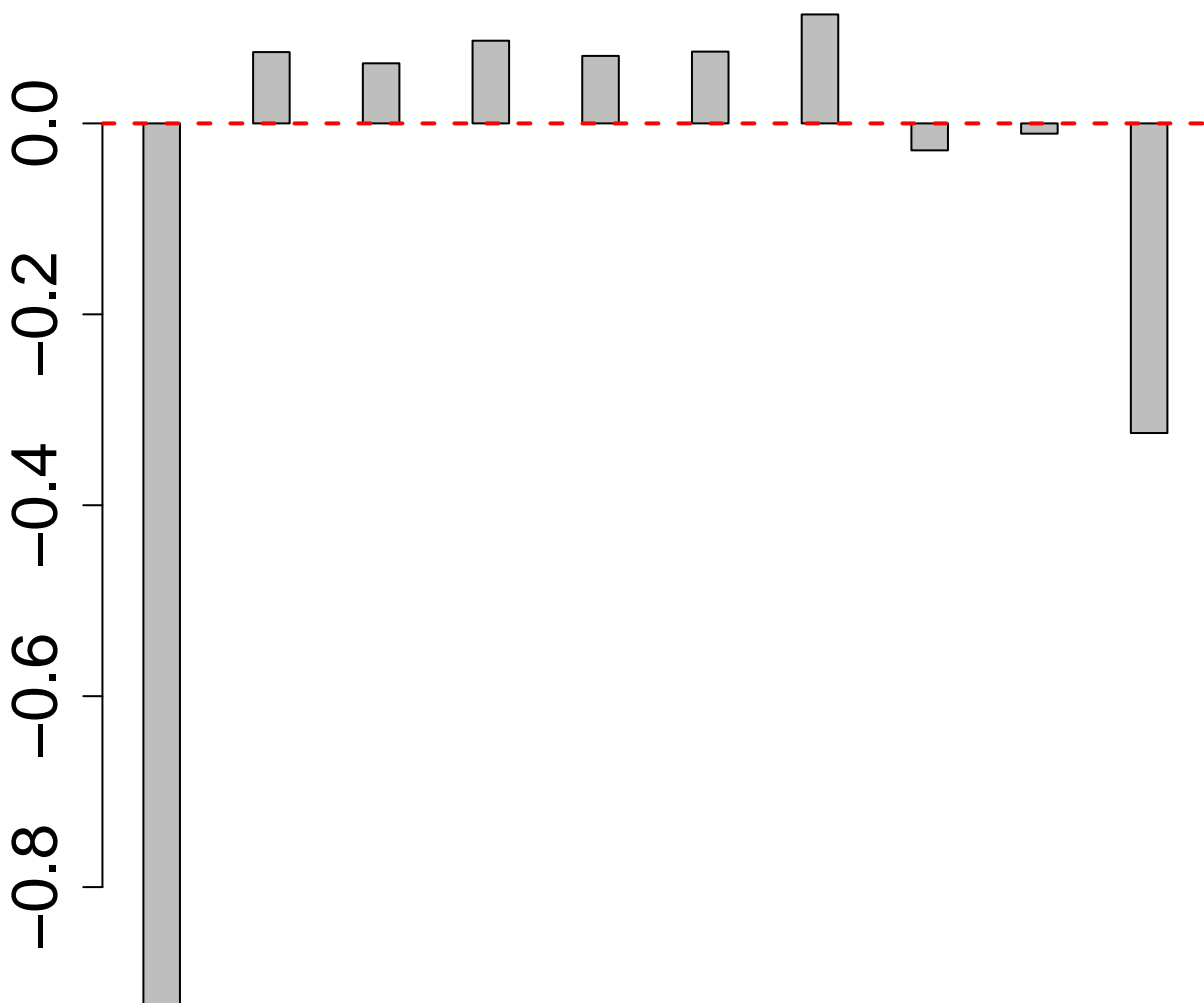

j2

# 6th sample sigular value vector

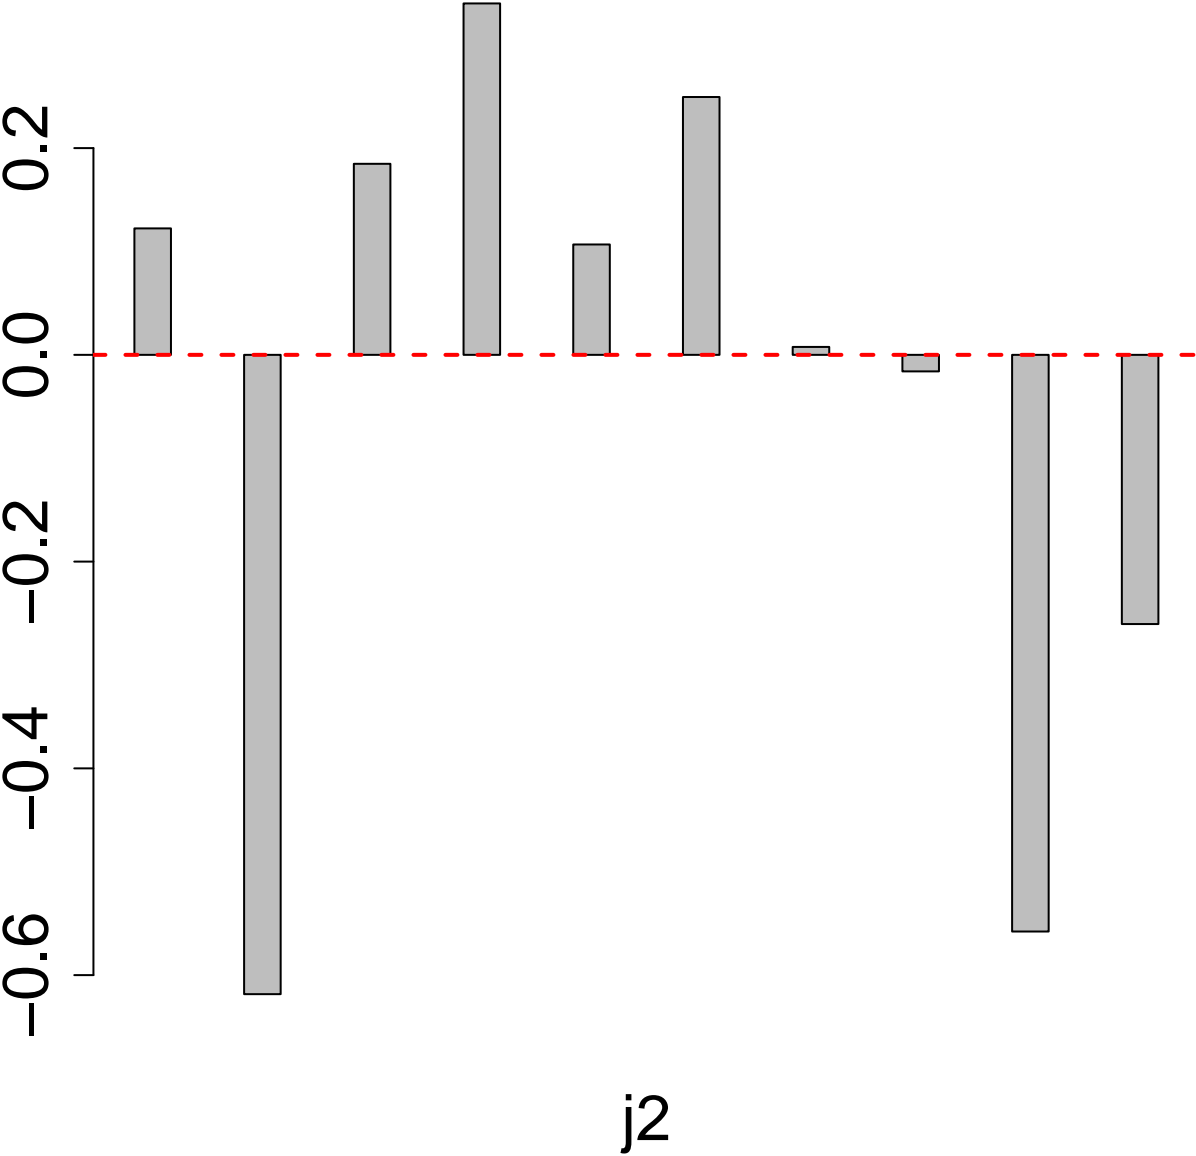

# 7th sample sigular value vector

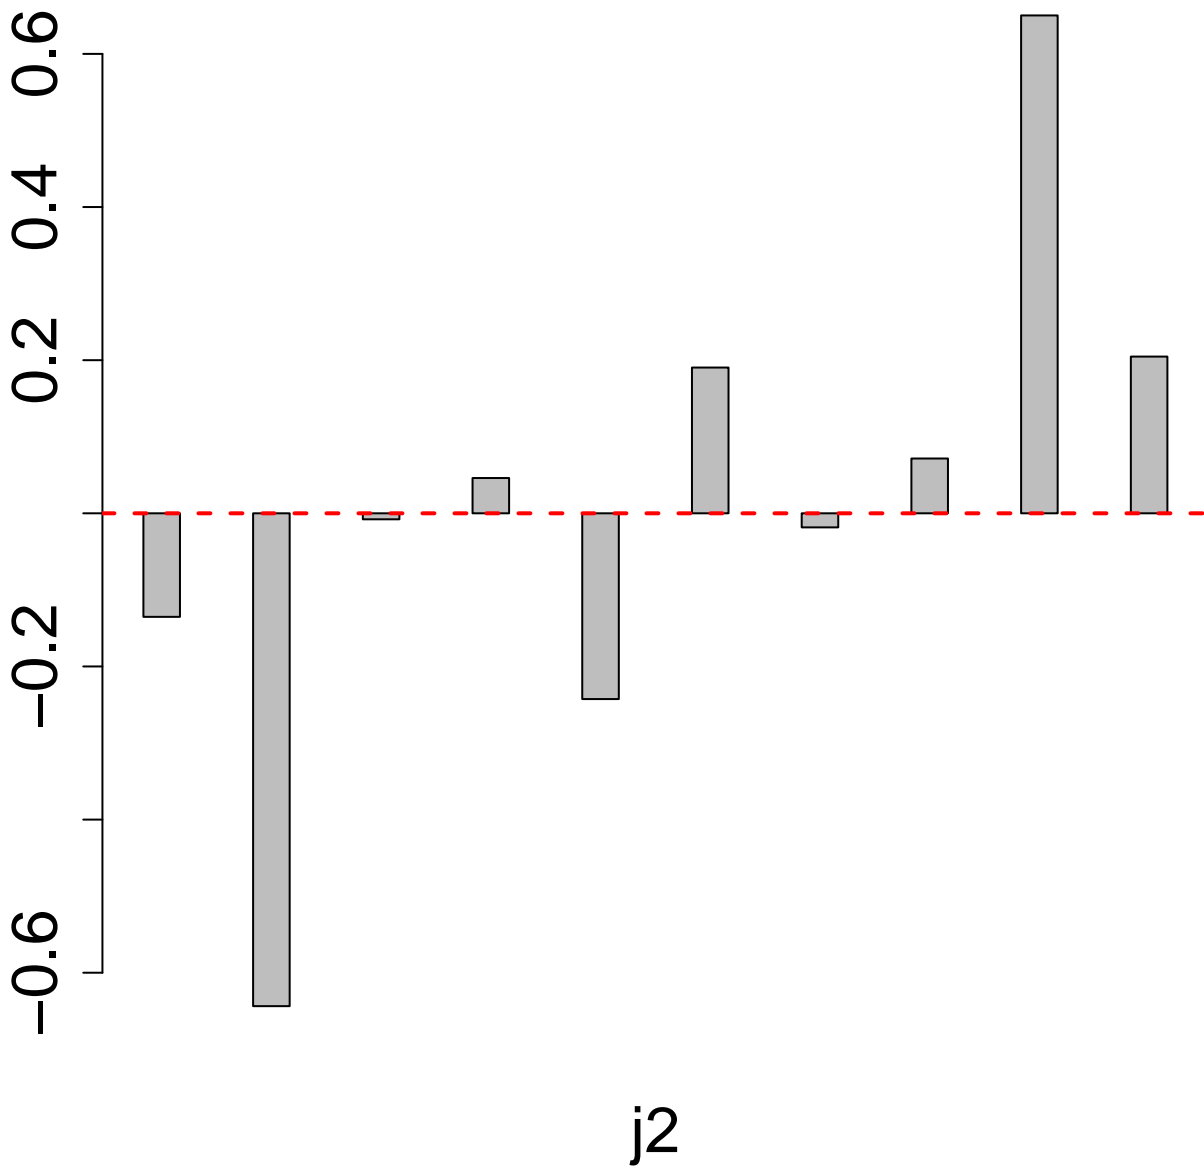

# 8th sample sigular value vector

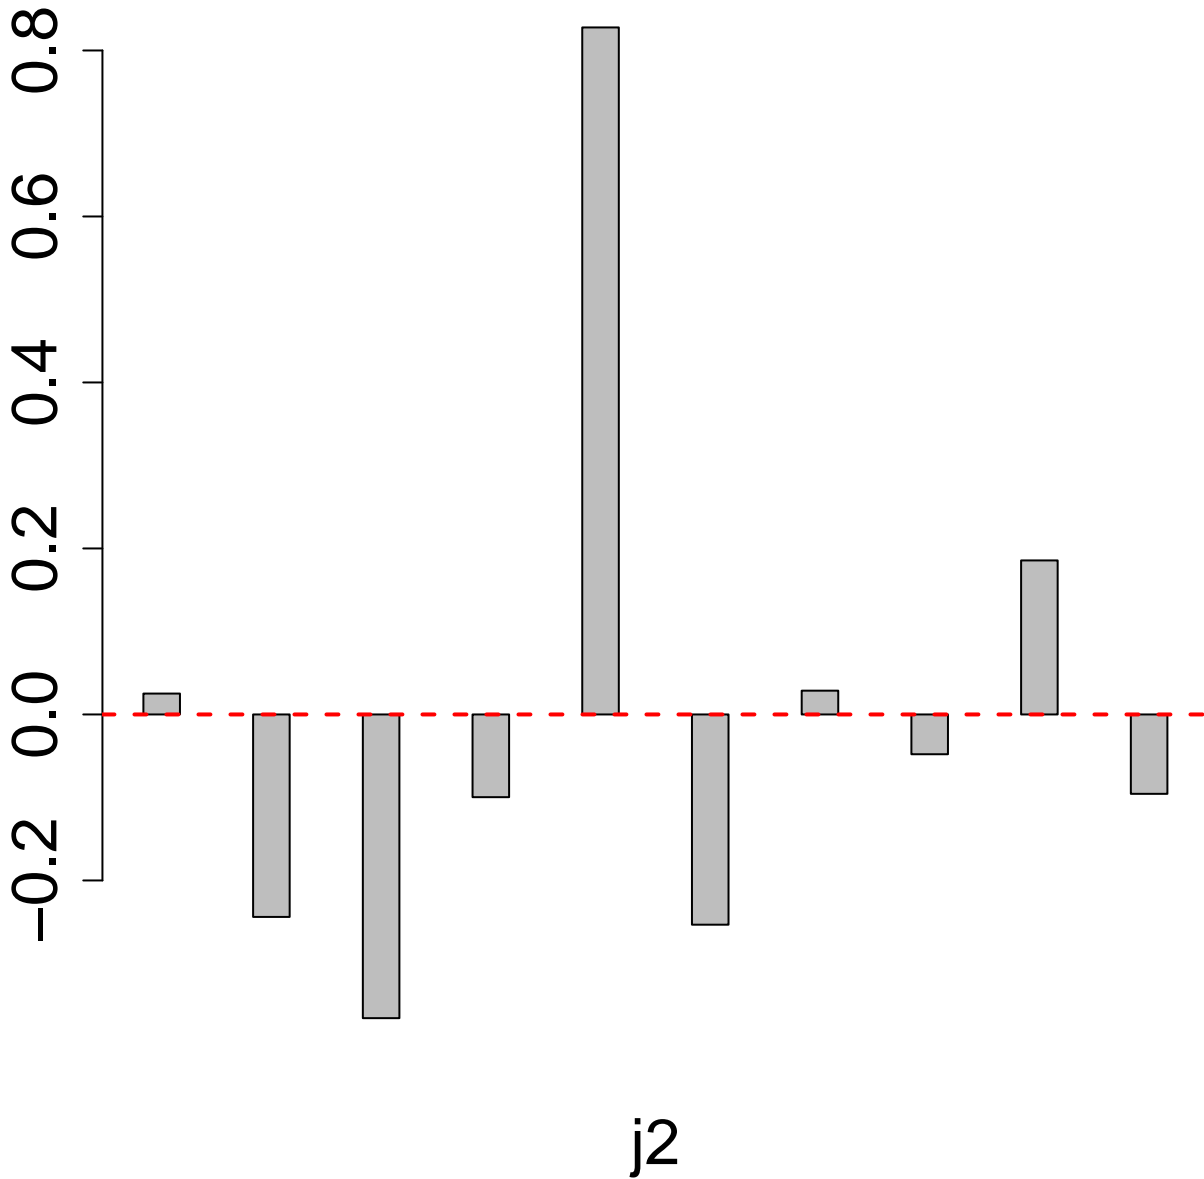



# 9th sample sigular value vector

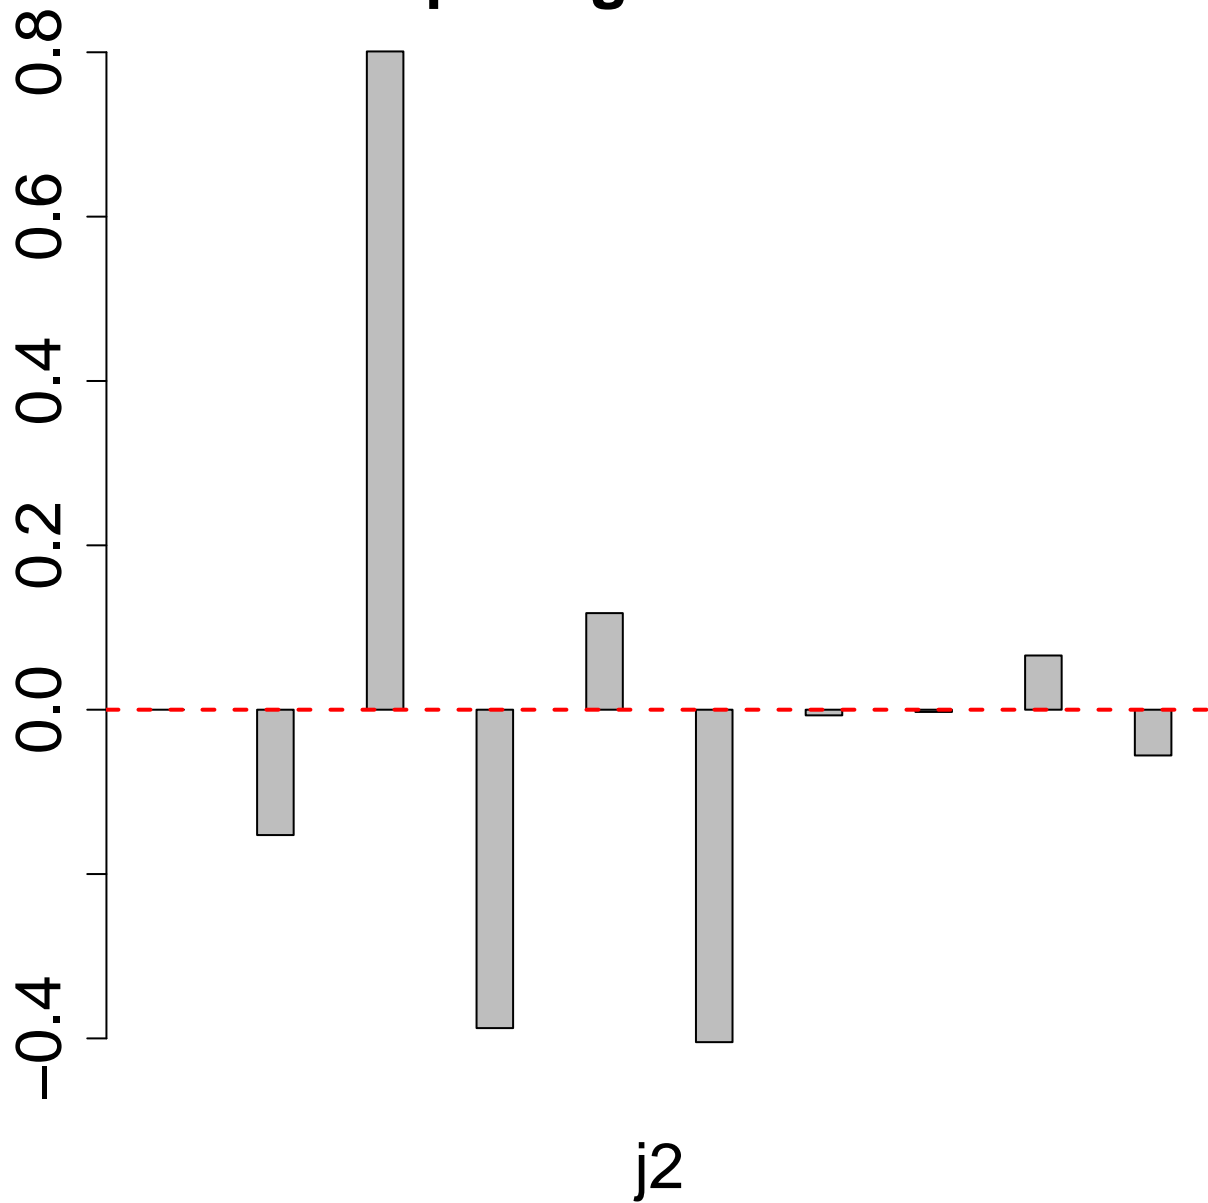

# 10th sample sigular value vector

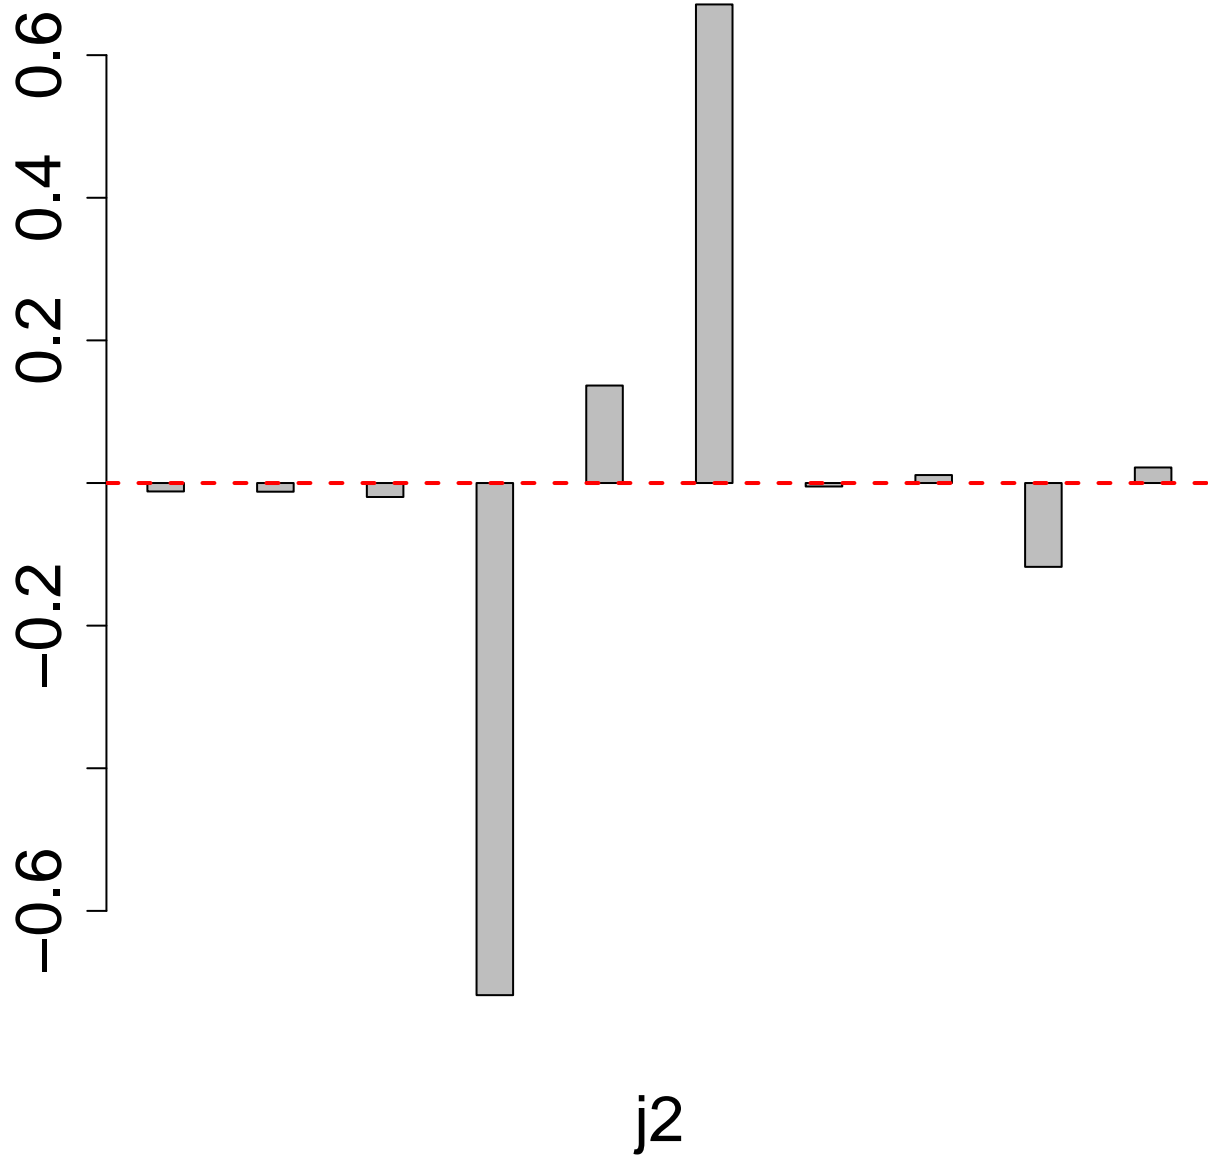

Supplement: 12920_2017_302_MOESM2_ESM.pdf [file 12920_2017_302_MOESM2_ESM.pdf]
